# Supplementary material
Source: PubMed Central journal article supplement (PMC3166551)
Supplement: NIHMS289541-supplement-01.pdf [file NIHMS289541-supplement-01.pdf]

## **SUPPLEMENTARY MATERIAL**

### **Application of Clustering Analyses to the Diagnosis of Huntington Disease in Mice and Other Diseases with Well-Defined Group Boundaries.**

**Jason B. Nikas, DPT and Walter C. Low, PhD**

**SUPPLEMENTARY TABLES (S1-S11)**

**&**

**SUPPLEMENTARY FIGURES (S1, S2)**

\*Corresponding Author: Jason B. Nikas, DPT  
Department of Neurosurgery, Medical School  
University of Minnesota  
4-218 McGuire Translational Research Facility  
2001 Sixth St., SE  
Minneapolis, MN 55455, USA  
T: 612-625-2868 / F: 612-626-9201  
E-mail: [nikas001@umn.edu](mailto:nikas001@umn.edu)

## K-Means Cluster Analysis Report

### Distance Section for Cluster 1

| Row        | Cluster | Dist1  | Dist2  |
|------------|---------|--------|--------|
| 1          | 1       | 3.0484 | 6.2439 |
| 2          | 1       | 3.3598 | 5.1079 |
| 3          | 1       | 2.4599 | 4.7514 |
| 4          | 1       | 2.2589 | 4.9319 |
| 5          | 1       | 2.8342 | 5.8760 |
| 6          | 1       | 2.6353 | 5.0683 |
| 7          | 1       | 2.3079 | 5.4675 |
| 8          | 1       | 2.8974 | 5.9031 |
| 9          | 1       | 1.2467 | 5.0675 |
| 10         | 1       | 3.0832 | 5.8090 |
| 11         | 1       | 2.4314 | 5.3043 |
| 12         | 1       | 1.8541 | 5.2802 |
| 13         | 1       | 2.1405 | 5.0057 |
| 14         | 1       | 2.0506 | 5.1658 |
| 15         | 1       | 2.0683 | 5.3467 |
| 16         | 1       | 2.5516 | 5.1310 |
| 17         | 1       | 1.9951 | 5.9111 |
| Count = 17 |         |        |        |

### Distance Section for Cluster 2

| Row        | Cluster | Dist1  | Dist2  |
|------------|---------|--------|--------|
| 18         | 2       | 4.3590 | 2.4987 |
| 19         | 2       | 4.8567 | 3.6213 |
| 20         | 2       | 4.9546 | 3.7667 |
| 21         | 2       | 6.2601 | 4.4283 |
| 22         | 2       | 6.2500 | 4.4591 |
| 23         | 2       | 5.2714 | 3.1049 |
| 24         | 2       | 4.7910 | 4.1525 |
| 25         | 2       | 6.3389 | 3.2945 |
| 26         | 2       | 6.6912 | 3.5422 |
| 27         | 2       | 7.7911 | 5.1342 |
| 28         | 2       | 6.0151 | 2.8845 |
| 29         | 2       | 6.4565 | 3.5405 |
| 30         | 2       | 9.9016 | 7.0177 |
| Count = 13 |         |        |        |

### Minimum Iteration Section

| Iteration No. | No. of Clusters | Percent of Variation | Bar Chart of Percent |
|---------------|-----------------|----------------------|----------------------|
| 2             | 2               | 65.76                |                      |

**Table S1:** Classification of the 30 original mice (17 WT & 13 R6/2) into two clusters according to the unsupervised KMCA. Rows #1-17 are the WT mice, whereas rows #18-30 are the R6/2 mice. Dist 1 & Dist 2 are the distances of each subject from the center of Cluster 1 and Cluster 2 respectively. The unsupervised KMCA correctly identified all of the 30 mice. All of the WT mice were classified into Cluster 1, whereas all of the R6/2 into Cluster 2. All 17 IVs were used in this setting, and the Percent of Variation was 65.76.

## K-Means Cluster Analysis Report

### Distance Section for Cluster 1

| Row | Cluster | Dist 1 | Dist 2 |
|-----|---------|--------|--------|
| 1   | 1       | 0.7891 | 3.9294 |
| 2   | 1       | 1.2586 | 2.3867 |
| 3   | 1       | 0.6668 | 2.9516 |
| 4   | 1       | 0.7301 | 3.5212 |
| 5   | 1       | 0.8012 | 4.0580 |
| 6   | 1       | 0.5311 | 3.9329 |
| 7   | 1       | 0.3766 | 3.7267 |
| 8   | 1       | 0.3705 | 3.5628 |
| 9   | 1       | 0.5965 | 3.8337 |
| 10  | 1       | 1.0336 | 3.8094 |
| 11  | 1       | 0.4837 | 3.4846 |
| 12  | 1       | 0.3604 | 3.3653 |
| 13  | 1       | 0.7213 | 2.9754 |
| 14  | 1       | 0.8561 | 3.0042 |
| 15  | 1       | 1.0921 | 4.1624 |
| 16  | 1       | 0.5316 | 3.9053 |
| 17  | 1       | 0.4197 | 3.7268 |

Count = 17

### Distance Section for Cluster 2

| Row | Cluster | Dist 1 | Dist 2 |
|-----|---------|--------|--------|
| 18  | 2       | 2.4043 | 1.1988 |
| 19  | 2       | 3.8064 | 0.9200 |
| 20  | 2       | 3.1157 | 1.1089 |
| 21  | 2       | 3.9263 | 1.0913 |
| 22  | 2       | 3.5241 | 0.7401 |
| 23  | 2       | 3.3865 | 0.9139 |
| 24  | 2       | 2.8613 | 0.7893 |
| 25  | 2       | 4.2573 | 0.9148 |
| 26  | 2       | 3.7675 | 1.3327 |
| 27  | 2       | 4.5809 | 1.6957 |
| 28  | 2       | 3.3639 | 1.1376 |
| 29  | 2       | 3.9215 | 0.4911 |
| 30  | 2       | 4.3145 | 1.6575 |

Count = 13

### Minimum Iteration Section

| Iteration No. | No. of Clusters | Percent of Variation | Bar Chart of Percent |
|---------------|-----------------|----------------------|----------------------|
| 1             | 2               | 22.04                |                      |

### Cluster Means

| Variables | Cluster1 | Cluster2 |
|-----------|----------|----------|
| Cr+PCr    | 8.943529 | 11.52708 |
| Gln       | 3.448176 | 5.975923 |
| Cr        | 5.472059 | 7.150462 |
| NAA       | 7.653588 | 6.222077 |
| Count     | 17       | 13       |

**Table S2:** Classification of the 30 original mice (17 WT & 13 R6/2) into two clusters according to ROC-supervised KMCA. Rows #1-17 are the WT mice, whereas rows #18-30 are the R6/2 mice. Dist 1 & Dist 2 are the distances of each subject from the center of Cluster 1 and Cluster 2 respectively. The ROC-supervised KMCA correctly identified all of the 30 mice. All of the WT mice were classified into Cluster 1, whereas all of the R6/2 into Cluster 2. The top four most significant IVs (AUC > 98%) according to ROC curve analysis were used in this setting, and the Percent of Variation was 22.04.

## K-Means Cluster Analysis Report

### Distance Section for Cluster 1

| Row | Cluster | Dist 1 | Dist 2 |
|-----|---------|--------|--------|
| 1   | 1       | 0.7902 | 3.8639 |
| 2   | 1       | 1.2696 | 2.2961 |
| 3   | 1       | 0.6710 | 2.8675 |
| 4   | 1       | 0.7381 | 3.4535 |
| 5   | 1       | 0.8140 | 3.9904 |
| 6   | 1       | 0.5394 | 3.8603 |
| 7   | 1       | 0.3805 | 3.6557 |
| 8   | 1       | 0.3724 | 3.4848 |
| 9   | 1       | 0.5998 | 3.7614 |
| 10  | 1       | 1.0408 | 3.7326 |
| 11  | 1       | 0.4892 | 3.4100 |
| 12  | 1       | 0.3653 | 3.2895 |
| 13  | 1       | 0.7329 | 2.8942 |
| 14  | 1       | 0.8642 | 2.9192 |
| 15  | 1       | 1.0957 | 4.0956 |
| 16  | 1       | 0.5395 | 3.8313 |
| 17  | 1       | 0.4253 | 3.6509 |

Count = 17

### Distance Section for Cluster 2

| Row | Cluster | Dist 1 | Dist 2 |
|-----|---------|--------|--------|
| 18  | 2       | 2.4386 | 1.1149 |
| 19  | 2       | 3.8438 | 0.9030 |
| 20  | 2       | 3.1619 | 1.0975 |
| 21  | 2       | 3.9816 | 1.1657 |
| 22  | 2       | 3.5657 | 0.7220 |
| 23  | 2       | 3.4384 | 0.9571 |
| 24  | 2       | 2.8977 | 0.6920 |
| 25  | 2       | 4.3046 | 0.9839 |
| 26  | 2       | 3.7964 | 1.2956 |
| 27  | 2       | 4.6501 | 1.8347 |
| 28  | 2       | 3.3970 | 1.0941 |
| 29  | 2       | 3.9734 | 0.6220 |
| 30  | 2       | 4.3701 | 1.7312 |
| 31  | 2       | 2.1247 | 1.8607 |

Count = 14

### Minimum Iteration Section

| Iteration No. | No. of Clusters | Percent of Variation | Bar Chart of Percent |
|---------------|-----------------|----------------------|----------------------|
| 1             | 2               | 24.86                |                      |

**Table S3:** Classification of the 30 original mice (17 WT & 13 R6/2) and one unknown mouse into two clusters according to ROC-supervised KMCA. Rows #1-17 are the WT mice, rows #18-30 are the R6/2 mice, and row #31 is the unknown mouse. Dist 1 & Dist 2 are the distances of each subject from the center of Cluster 1 and Cluster 2 respectively. All of the WT mice are classified into Cluster 1, whereas all of the R6/2 into Cluster 2. The unknown mouse (#31) was correctly identified as an R6/2 mouse by the ROC-supervised KMCA. The top four most significant IVs (AUC > 98%) according to ROC curve analysis were used in this setting.

### K-Means Cluster Analysis Report

**Distance Section for Cluster 1**

| Row | Cluster | Dist1  | Dist2  |
|-----|---------|--------|--------|
| 1   | 1       | 1.0827 | 1.4372 |
| 2   | 1       | 0.3848 | 2.1191 |
| 3   | 1       | 0.1526 | 2.3371 |
| 4   | 1       | 0.6097 | 2.1726 |
| 5   | 1       | 0.2713 | 2.4490 |
| 6   | 1       | 0.4182 | 2.0032 |
| 7   | 1       | 1.0664 | 3.2842 |

Count = 7

**Distance Section for Cluster 2**

| Row | Cluster | Dist1  | Dist2  |
|-----|---------|--------|--------|
| 8   | 2       | 1.3609 | 0.8573 |
| 9   | 2       | 2.3820 | 0.3837 |
| 10  | 2       | 2.0063 | 0.2201 |
| 11  | 2       | 1.5916 | 0.8114 |
| 12  | 2       | 2.0422 | 0.2545 |
| 13  | 2       | 4.0331 | 1.8310 |

Count = 6

**Minimum Iteration Section**

| Iteration No. | No. of Clusters | Percent of Variation | Bar Chart of Percent |
|---------------|-----------------|----------------------|----------------------|
| 1             | 2               | 33.78                |                      |

**Cluster Means**

| Variables | Cluster1  | Cluster2 |
|-----------|-----------|----------|
| R62_TTau  | 0.4010287 | 0.354751 |
| R62_GPCPC | 2.043571  | 3.182    |
| Count     | 7         | 6        |

**Table S4:** Classification of the 13 original R6/2 mice [(7) 8-wk old & (6) 12-wk old] into two clusters according to the R6/2-ROC-supervised KMCA. Rows #1-7 are the 8-wk old R6/2, whereas rows #8-13 are the 12-wk old R6/2 mice. Dist 1 & Dist 2 are the distances of each subject from the center of Cluster 1 and Cluster 2 respectively. Our KMCA DBM correctly identified all of the R6/2 mice. All of the 8-wk old R6/2 mice were classified into Cluster 1, whereas all of the 12-wk old R6/2 mice into Cluster 2. TTau and GPC+PC, the top two most significant IVs (AUC>95%) according to R6/2 ROC curve analysis, were used in this setting, and the Percent of Variation was 33.78.

## Fuzzy Clustering Report

### Cluster Medoids Section

| Variable | Cluster1 | Cluster2 |
|----------|----------|----------|
| Cr+PCr   | 8.553    | 12.117   |
| Gln      | 3.513    | 6.169    |
| Cr       | 5.54     | 7.33     |
| NAA      | 7.85     | 6.189    |
| Row      | 7        | 29       |

### Membership Matrix Section

| Row | Cluster | Prob in 1 | Prob in 2 |
|-----|---------|-----------|-----------|
| 1   | 1       | 0.8594    | 0.1406    |
| 2   | 1       | 0.6576    | 0.3424    |
| 3   | 1       | 0.8299    | 0.1701    |
| 4   | 1       | 0.8490    | 0.1510    |
| 5   | 1       | 0.8618    | 0.1382    |
| 6   | 1       | 0.9018    | 0.0982    |
| 7   | 1       | 0.9111    | 0.0889    |
| 8   | 1       | 0.9072    | 0.0928    |
| 9   | 1       | 0.8873    | 0.1127    |
| 10  | 1       | 0.8074    | 0.1926    |
| 11  | 1       | 0.8874    | 0.1126    |
| 12  | 1       | 0.9003    | 0.0997    |
| 13  | 1       | 0.8185    | 0.1815    |
| 14  | 1       | 0.7923    | 0.2077    |
| 15  | 1       | 0.8184    | 0.1816    |
| 16  | 1       | 0.8965    | 0.1035    |
| 17  | 1       | 0.9097    | 0.0903    |
| 18  | 2       | 0.2907    | 0.7093    |
| 19  | 2       | 0.1482    | 0.8518    |
| 20  | 2       | 0.1972    | 0.8028    |
| 21  | 2       | 0.1624    | 0.8376    |
| 22  | 2       | 0.1262    | 0.8738    |
| 23  | 2       | 0.1694    | 0.8306    |
| 24  | 2       | 0.1709    | 0.8291    |
| 25  | 2       | 0.1418    | 0.8582    |
| 26  | 2       | 0.2234    | 0.7766    |
| 27  | 2       | 0.2422    | 0.7578    |
| 28  | 2       | 0.2214    | 0.7786    |
| 29  | 2       | 0.1174    | 0.8826    |
| 30  | 2       | 0.2482    | 0.7518    |

### Summary Section

| Number Clusters | Average Distance | Average Silhouette | F(U)   | Fc(U)  | D(U)   | Dc(U)  |
|-----------------|------------------|--------------------|--------|--------|--------|--------|
| 2               | 7.091622         | 0.654794           | 0.7313 | 0.4626 | 0.0622 | 0.1244 |

**Table S5:** Classification of our 30 mice (17 WT & 13 R6/2) into two clusters according to the ROC-supervised FCA. Rows #1-17 are the WT mice, whereas rows #18-30 are the R6/2 mice. Prob in 1 & Prob in 2 are the membership probabilities of each subject in Cluster 1 and Cluster 2 respectively. The ROC-supervised FCA correctly identified all of the 30 mice. All of the WT mice were classified into Cluster 1, whereas all of the R6/2 into Cluster 2. The top four most significant IVs (AUC>98%) were used in this setting, as can be seen from the Cluster Medoids Section. Subjects # 7 and # 29 were the medoids (closest to the center) of Cluster 1 and Cluster 2 respectively for this setting. As can be seen from the values of the Average Silhouette, Fc(U), and Dc(U) in the Summary Section, as well as from the membership probabilities, this was the best setting and was used in the development of our FCA DBM. The Average Distance denotes the value of the average dissimilarity for this setting. [AS=0.655].

## Fuzzy Clustering Report

### Cluster Medoids Section

| Variable | Cluster1 | Cluster2 |
|----------|----------|----------|
| Cr+PCr   | 8.553    | 12.117   |
| Gln      | 3.513    | 6.169    |
| Cr       | 5.54     | 7.33     |
| NAA      | 7.85     | 6.189    |
| Row      | 7        | 29       |

### Membership Matrix Section

| Row | Cluster | Prob in 1 | Prob in 2 |
|-----|---------|-----------|-----------|
| 1   | 1       | 0.8653    | 0.1347    |
| 2   | 1       | 0.6581    | 0.3419    |
| 3   | 1       | 0.8275    | 0.1725    |
| 4   | 1       | 0.8501    | 0.1499    |
| 5   | 1       | 0.8557    | 0.1443    |
| 6   | 1       | 0.8964    | 0.1036    |
| 7   | 1       | 0.9107    | 0.0893    |
| 8   | 1       | 0.9018    | 0.0982    |
| 9   | 1       | 0.8902    | 0.1098    |
| 10  | 1       | 0.8029    | 0.1971    |
| 11  | 1       | 0.8911    | 0.1089    |
| 12  | 1       | 0.8969    | 0.1031    |
| 13  | 1       | 0.8197    | 0.1803    |
| 14  | 1       | 0.7915    | 0.2085    |
| 15  | 1       | 0.8249    | 0.1751    |
| 16  | 1       | 0.8928    | 0.1072    |
| 17  | 1       | 0.9032    | 0.0968    |
| 18  | 2       | 0.2880    | 0.7120    |
| 19  | 2       | 0.1480    | 0.8520    |
| 20  | 2       | 0.1954    | 0.8046    |
| 21  | 2       | 0.1643    | 0.8357    |
| 22  | 2       | 0.1271    | 0.8729    |
| 23  | 2       | 0.1666    | 0.8334    |
| 24  | 2       | 0.1706    | 0.8294    |
| 25  | 2       | 0.1423    | 0.8577    |
| 26  | 2       | 0.2241    | 0.7759    |
| 27  | 2       | 0.2435    | 0.7565    |
| 28  | 2       | 0.2241    | 0.7759    |
| 29  | 2       | 0.1192    | 0.8808    |
| 30  | 2       | 0.2511    | 0.7489    |
| 31  | 1       | 0.7633    | 0.2367    |

### Summary Section

| Number Clusters | Average Distance | Average Silhouette | F(U)   | Fc(U)  | D(U)   | Dc(U)  |
|-----------------|------------------|--------------------|--------|--------|--------|--------|
| 2               | 7.432293         | 0.651339           | 0.7272 | 0.4544 | 0.0641 | 0.1282 |

**Table S6:** Classification of our 30 mice (17 WT & 13 R6/2) and one unknown mouse into two clusters according to the ROC-supervised FCA. Rows #1-17 are the WT mice, rows #18-30 are the R6/2 mice, and row #31 is the unknown mouse. Prob in 1 & Prob in 2 are the membership probabilities of each subject in Cluster 1 and Cluster 2 respectively. All of the WT mice were classified into Cluster 1, whereas all of the R6/2 into Cluster 2. The unknown mouse (#31) was correctly identified as a WT mouse and placed in Cluster 1. The top four most significant IVs (AUC>98%) were used in this setting, as can be seen from the Cluster Medoids Section. Subjects # 7 and # 29 were the medoids (closest to the center) of Cluster 1 and Cluster 2 respectively for this group of 31 mice.

## Fuzzy Clustering Report

### Cluster Medoids Section

| Variable  | Cluster1  | Cluster2  |
|-----------|-----------|-----------|
| R62_TTau  | 0.4054208 | 0.3580374 |
| R62_GPCPC | 2.036     | 3.042     |
| Row       | 3         | 10        |

### Membership Matrix Section

| Row | Cluster | Prob in 1 | Prob in 2 |
|-----|---------|-----------|-----------|
| 1   | 1       | 0.5124    | 0.4876    |
| 2   | 1       | 0.8758    | 0.1242    |
| 3   | 1       | 0.9199    | 0.0801    |
| 4   | 1       | 0.8221    | 0.1779    |
| 5   | 1       | 0.8938    | 0.1062    |
| 6   | 1       | 0.8174    | 0.1826    |
| 7   | 1       | 0.7822    | 0.2178    |
| 8   | 2       | 0.2785    | 0.7215    |
| 9   | 2       | 0.1637    | 0.8363    |
| 10  | 2       | 0.0841    | 0.9159    |
| 11  | 2       | 0.2212    | 0.7788    |
| 12  | 2       | 0.0892    | 0.9108    |
| 13  | 2       | 0.3095    | 0.6905    |

### Summary Section

| Number Clusters | Average Distance | Average Silhouette | F(U)   | Fc(U)  | D(U)   | Dc(U)  |
|-----------------|------------------|--------------------|--------|--------|--------|--------|
| 2               | 3.016061         | 0.525337           | 0.7115 | 0.4230 | 0.0996 | 0.1992 |

**Table S7:** Classification of the 13 original R6/2 mice [(7) 8-wk old & (6) 12-wk old] into two clusters according to the R6/2-ROC-supervised FCA. Rows #1-7 are the 8-wk old R6/2, whereas rows #8-13 are the 12-wk old R6/2 mice. Prob in 1 & Prob in 2 are the membership probabilities of each subject in Cluster 1 and Cluster 2 respectively. The R6/2-ROC-supervised FCA correctly identified all of the R6/2 mice. All of the 8-wk old R6/2 mice were classified into Cluster 1, whereas all of the 12-wk old R6/2 mice into Cluster 2. The top two most significant IVs (TTau & GPC+PC) (AUC>95%) according to the R6/2 ROC curve analysis were used in this setting. Subjects # 3 and # 10 were the medoids (closest to the center) of Cluster 1 and Cluster 2 respectively for this group of 13 mice. [AS=0.525].



### Clustering by Medoid Partitioning Report

Variables R62\_Cr+PCr to R62\_PCr/Cr  
 Method: Kaufman - Rousseeuw, Objective Function: Silhouette  
 Distance Type: Euclidean, Scale Type: Standard Deviation

#### Row Detail Section

| Row             | Cluster | Nearest Neighbor | Average Distance Within | Average Distance Neighbor | Silhouette Value | Silhouette Bar |
|-----------------|---------|------------------|-------------------------|---------------------------|------------------|----------------|
| 3               | 1       | 2                | 40.45                   | 71.04                     | 0.4306           |                |
| 5               | 1       | 2                | 42.96                   | 72.13                     | 0.4044           |                |
| 6               | 1       | 2                | 42.80                   | 62.92                     | 0.3197           |                |
| 7               | 1       | 2                | 47.74                   | 69.64                     | 0.3144           |                |
| 4               | 1       | 2                | 55.33                   | 75.66                     | 0.2687           |                |
| 2               | 1       | 2                | 50.26                   | 64.40                     | 0.2195           |                |
| 1               | 1       | 2                | 50.07                   | 57.66                     | 0.1316           |                |
| Cluster Average | 1       | (7)              | 47.09                   | 67.64                     | 0.2984           |                |
| 13              | 2       | 1                | 70.02                   | 91.24                     | 0.2325           |                |
| 9               | 2       | 1                | 52.43                   | 64.88                     | 0.1920           |                |
| 10              | 2       | 1                | 59.81                   | 73.85                     | 0.1901           |                |
| 12              | 2       | 1                | 49.42                   | 60.55                     | 0.1838           |                |
| 11              | 2       | 1                | 50.15                   | 59.09                     | 0.1513           |                |
| 8               | 2       | 1                | 55.52                   | 56.21                     | 0.0122           |                |
| Cluster Average | 2       | (6)              | 56.23                   | 67.64                     | 0.1603           |                |
| Overall Average |         | (13)             | 51.31                   | 67.64                     | 0.2347           | = SC           |

**Table S8:** Classification of the 13 original R6/2 mice [(7) 8-wk old & (6) 12-wk old] into two clusters according to the unsupervised MPCA. Rows #1-7 are the 8-wk old R6/2, whereas rows #8-13 are the 12-wk old R6/2 mice. The unsupervised MPCA correctly identified all of the R6/2 mice. All of the 8-wk old R6/2 mice were classified into Cluster 1, whereas all of the 12-wk old R6/2 mice into Cluster 2. All 17 IVs were used in this setting. The Average Silhouette (AS) value was 0.235. “Average Distance Within” is the average distance of a subject with respect to all other members of the same cluster, whereas “Average Distance Neighbor” is the average distance of a subject with respect to all members of the other cluster.

### Clustering by Medoid Partitioning Report

Variables Cr+PCr, Gln, Cr, NAA  
 Method: Kaufman - Rousseeuw, Objective Function: Silhouette  
 Distance Type: Euclidean, Scale Type: Standard Deviation

#### Row Detail Section

| Row             | Cluster | Nearest Neighbor | Average Distance Within | Average Distance Neighbor | Silhouette Value | Silhouette Bar |
|-----------------|---------|------------------|-------------------------|---------------------------|------------------|----------------|
| 7               | 1       | 2                | 15.74                   | 75.45                     | 0.7913           |                |
| 17              | 1       | 2                | 15.86                   | 75.48                     | 0.7899           |                |
| 6               | 1       | 2                | 16.94                   | 79.39                     | 0.7866           |                |
| 8               | 1       | 2                | 15.64                   | 72.35                     | 0.7839           |                |
| 16              | 1       | 2                | 17.21                   | 78.80                     | 0.7816           |                |
| 12              | 1       | 2                | 15.77                   | 68.66                     | 0.7703           |                |
| 9               | 1       | 2                | 17.81                   | 77.42                     | 0.7700           |                |
| 11              | 1       | 2                | 16.89                   | 70.77                     | 0.7613           |                |
| 5               | 1       | 2                | 20.73                   | 81.83                     | 0.7467           |                |
| 1               | 1       | 2                | 20.50                   | 79.32                     | 0.7415           |                |
| 4               | 1       | 2                | 20.13                   | 71.64                     | 0.7190           |                |
| 15              | 1       | 2                | 25.25                   | 83.68                     | 0.6982           |                |
| 3               | 1       | 2                | 19.13                   | 60.90                     | 0.6859           |                |
| 10              | 1       | 2                | 24.67                   | 77.07                     | 0.6799           |                |
| 13              | 1       | 2                | 19.93                   | 61.15                     | 0.6741           |                |
| 14              | 1       | 2                | 21.81                   | 61.70                     | 0.6464           |                |
| 2               | 1       | 2                | 28.32                   | 50.48                     | 0.4390           |                |
| Cluster Average | 1       | (17)             | 19.55                   | 72.12                     | 0.7215           |                |
| 29              | 2       | 1                | 24.49                   | 77.70                     | 0.6848           |                |
| 25              | 2       | 1                | 28.15                   | 84.15                     | 0.6655           |                |
| 22              | 2       | 1                | 25.02                   | 69.91                     | 0.6421           |                |
| 19              | 2       | 1                | 27.68                   | 75.35                     | 0.6326           |                |
| 21              | 2       | 1                | 29.56                   | 77.75                     | 0.6198           |                |
| 23              | 2       | 1                | 27.78                   | 67.37                     | 0.5877           |                |
| 27              | 2       | 1                | 40.96                   | 90.59                     | 0.5479           |                |
| 24              | 2       | 1                | 26.12                   | 57.18                     | 0.5431           |                |
| 26              | 2       | 1                | 34.40                   | 74.62                     | 0.5391           |                |
| 30              | 2       | 1                | 39.94                   | 85.43                     | 0.5325           |                |
| 28              | 2       | 1                | 31.73                   | 66.90                     | 0.5256           |                |
| 20              | 2       | 1                | 29.50                   | 62.08                     | 0.5248           |                |
| 18              | 2       | 1                | 32.42                   | 48.59                     | 0.3328           |                |
| Cluster Average | 2       | (13)             | 30.60                   | 72.12                     | 0.5676           |                |
| Overall Average |         | (30)             | 24.34                   | 72.12                     | 0.6548           | = SC           |

**Table S9:** Classification of the 30 original mice (17 WT & 13 R6/2) into two clusters according to the ROC-supervised MPCA. Rows #1-17 are the WT mice, whereas rows #18-30 are the R6/2 mice. The ROC-supervised MPCA correctly identified all of the 30 mice. All of the WT mice were classified into Cluster 1, whereas all of the R6/2 mice into Cluster 2. The top four most significant IVs (AUC > 98%) were used in this setting, and the Average Silhouette (AS) value was 0.655.

### Clustering by Medoid Partitioning Report

Variables Cr+PCr, Gln, Cr, NAA  
 Method: Kaufman - Rousseeuw, Objective Function: Silhouette  
 Distance Type: Euclidean, Scale Type: Standard Deviation

#### Row Detail Section

| Row             | Cluster | Nearest Neighbor | Average Distance Within | Average Distance Neighbor | Silhouette Value | Silhouette Bar |
|-----------------|---------|------------------|-------------------------|---------------------------|------------------|----------------|
| 17              | 1       | 2                | 17.37                   | 75.50                     | 0.7699           |                |
| 7               | 1       | 2                | 17.53                   | 75.36                     | 0.7674           |                |
| 8               | 1       | 2                | 16.96                   | 72.38                     | 0.7657           |                |
| 6               | 1       | 2                | 18.71                   | 79.36                     | 0.7642           |                |
| 16              | 1       | 2                | 18.92                   | 78.76                     | 0.7598           |                |
| 12              | 1       | 2                | 17.12                   | 68.63                     | 0.7506           |                |
| 9               | 1       | 2                | 19.58                   | 77.25                     | 0.7466           |                |
| 11              | 1       | 2                | 18.43                   | 70.62                     | 0.7391           |                |
| 5               | 1       | 2                | 22.50                   | 81.81                     | 0.7250           |                |
| 1               | 1       | 2                | 22.35                   | 79.09                     | 0.7174           |                |
| 4               | 1       | 2                | 21.68                   | 71.48                     | 0.6967           |                |
| 3               | 1       | 2                | 19.69                   | 60.92                     | 0.6768           |                |
| 15              | 1       | 2                | 27.00                   | 83.38                     | 0.6762           |                |
| 10              | 1       | 2                | 25.44                   | 77.22                     | 0.6706           |                |
| 13              | 1       | 2                | 20.76                   | 61.06                     | 0.6600           |                |
| 14              | 1       | 2                | 22.23                   | 61.72                     | 0.6399           |                |
| 2               | 1       | 2                | 27.85                   | 50.52                     | 0.4486           |                |
| 31              | 1       | 2                | 42.55                   | 43.23                     | 0.0157           |                |
| Cluster Average | 1       | (18)             | 22.04                   | 70.46                     | 0.6661           |                |
| 29              | 2       | 1                | 24.47                   | 75.99                     | 0.6780           |                |
| 25              | 2       | 1                | 28.03                   | 82.00                     | 0.6581           |                |
| 22              | 2       | 1                | 24.97                   | 67.99                     | 0.6328           |                |
| 19              | 2       | 1                | 27.56                   | 73.07                     | 0.6228           |                |
| 21              | 2       | 1                | 29.55                   | 76.27                     | 0.6125           |                |
| 23              | 2       | 1                | 27.65                   | 66.29                     | 0.5830           |                |
| 27              | 2       | 1                | 40.95                   | 89.49                     | 0.5424           |                |
| 24              | 2       | 1                | 26.08                   | 55.53                     | 0.5304           |                |
| 26              | 2       | 1                | 34.25                   | 72.20                     | 0.5255           |                |
| 30              | 2       | 1                | 39.98                   | 83.84                     | 0.5232           |                |
| 20              | 2       | 1                | 29.42                   | 60.94                     | 0.5173           |                |
| 28              | 2       | 1                | 31.72                   | 64.88                     | 0.5111           |                |
| 18              | 2       | 1                | 32.31                   | 47.48                     | 0.3194           |                |
| Cluster Average | 2       | (13)             | 30.53                   | 70.46                     | 0.5582           |                |
| Overall Average |         | (31)             | 25.60                   | 70.46                     | 0.6209           | = SC           |

**Table S10:** Classification of the 30 original mice (17 WT & 13 R6/2) and one unknown mouse into two clusters according to the ROC-supervised MPCA. Rows #1-17 are the WT mice, rows #18-30 are the R6/2 mice, and row #31 is the unknown mouse. All of the WT mice are classified into Cluster 1, whereas all of the R6/2 into Cluster 2. The unknown mouse (#31) – an R6/2 by genotyping – was incorrectly identified as a WT mouse and classified in Cluster 1, along with the WT mice. The Silhouette Value of 0.0157 of mouse #31 (the unknown), by being so close to 0, indicates that the decision on its classification was hardly better than the chance decision (50-50). The top four most significant IVs (AUC > 98%) were used in this setting.

### Clustering by Medoid Partitioning Report

Variables R62\_TTau, R62\_GPC+PC  
 Method: Kaufman - Rousseeuw, Objective Function: Silhouette  
 Distance Type: Euclidean, Scale Type: Standard Deviation

#### Row Detail Section

| Row             | Cluster | Nearest Neighbor | Average Distance Within | Average Distance Neighbor | Silhouette Value | Silhouette Bar |
|-----------------|---------|------------------|-------------------------|---------------------------|------------------|----------------|
| 3               | 1       | 2                | 12.46                   | 45.89                     | 0.7285           |                |
| 5               | 1       | 2                | 13.62                   | 48.06                     | 0.7166           |                |
| 2               | 1       | 2                | 14.00                   | 41.86                     | 0.6656           |                |
| 6               | 1       | 2                | 14.97                   | 39.66                     | 0.6226           |                |
| 7               | 1       | 2                | 24.40                   | 63.40                     | 0.6151           |                |
| 4               | 1       | 2                | 16.87                   | 42.87                     | 0.6064           |                |
| 1               | 1       | 2                | 24.81                   | 28.85                     | 0.1400           |                |
| Cluster Average | 1       | (7)              | 17.30                   | 44.37                     | 0.5850           |                |
| 10              | 2       | 1                | 15.85                   | 39.63                     | 0.6002           |                |
| 12              | 2       | 1                | 16.18                   | 40.32                     | 0.5987           |                |
| 9               | 2       | 1                | 20.07                   | 46.99                     | 0.5729           |                |
| 13              | 2       | 1                | 44.64                   | 80.42                     | 0.4449           |                |
| 11              | 2       | 1                | 21.26                   | 31.39                     | 0.3229           |                |
| 8               | 2       | 1                | 22.12                   | 27.48                     | 0.1949           |                |
| Cluster Average | 2       | (6)              | 23.35                   | 44.37                     | 0.4558           |                |
| Overall Average |         | (13)             | 20.10                   | 44.37                     | 0.5253           | = SC           |

**Table S11:** Classification of the 13 original R6/2 mice [(7) 8-wk old & (6) 12-wk old] into two clusters according to the R6/2-ROC-supervised MPCA. Rows #1-7 are the 8-wk old R6/2, whereas rows #8-13 are the 12-wk old R6/2 mice. The R6/2-ROC-supervised MPCA correctly identified all of the R6/2 mice. All of the 8-wk old R6/2 mice were classified into Cluster 1, whereas all of the 12-wk old R6/2 mice into Cluster 2. The top two most significant IVs (TTau & GPC+PC) (AUC>95%) according to the R6/2 ROC curve analysis were used in this setting. The Average Silhouette value (AS) was 0.525.

## ROC-supervised HCA (Test 2)

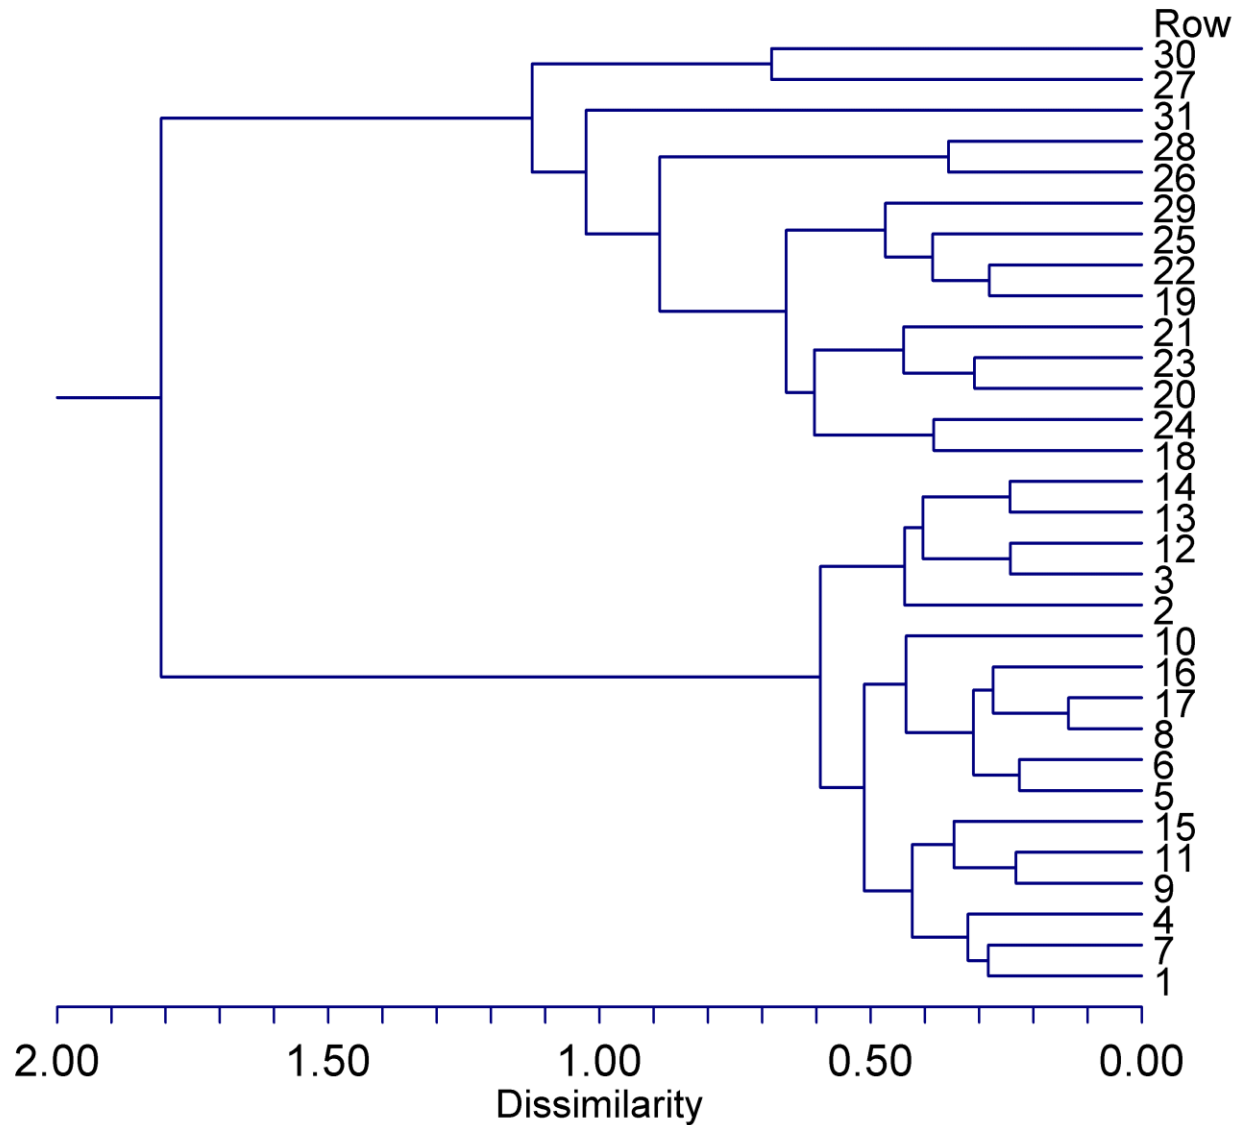

**Figure S1. Dendrogram classification of the 30 original mice and one unknown mouse by the ROC-supervised HCA.** Rows #1-17 are the WT mice, rows #18-30 are the R6/2 mice, and row #31 is the unknown mouse. The ROC-supervised HCA correctly identified that unknown mouse as an R6/2 (confirmed via genotyping). More specifically, looking in that area of the dendrogram where there are only two clusters (Dissimilarity range of  $\sim 1.2-1.7$ ), one can see that subjects # 1-17 (all of the WT mice) were classified into the lower cluster, whereas subjects #18-30 (all of the R6/2 mice) and # 31 (the unknown mouse) were classified together into the upper cluster. The top four most significant IVs (AUC > 98%) according to ROC curve analysis were used in this setting.

## R6/2-ROC-supervised HCA (Test 3)

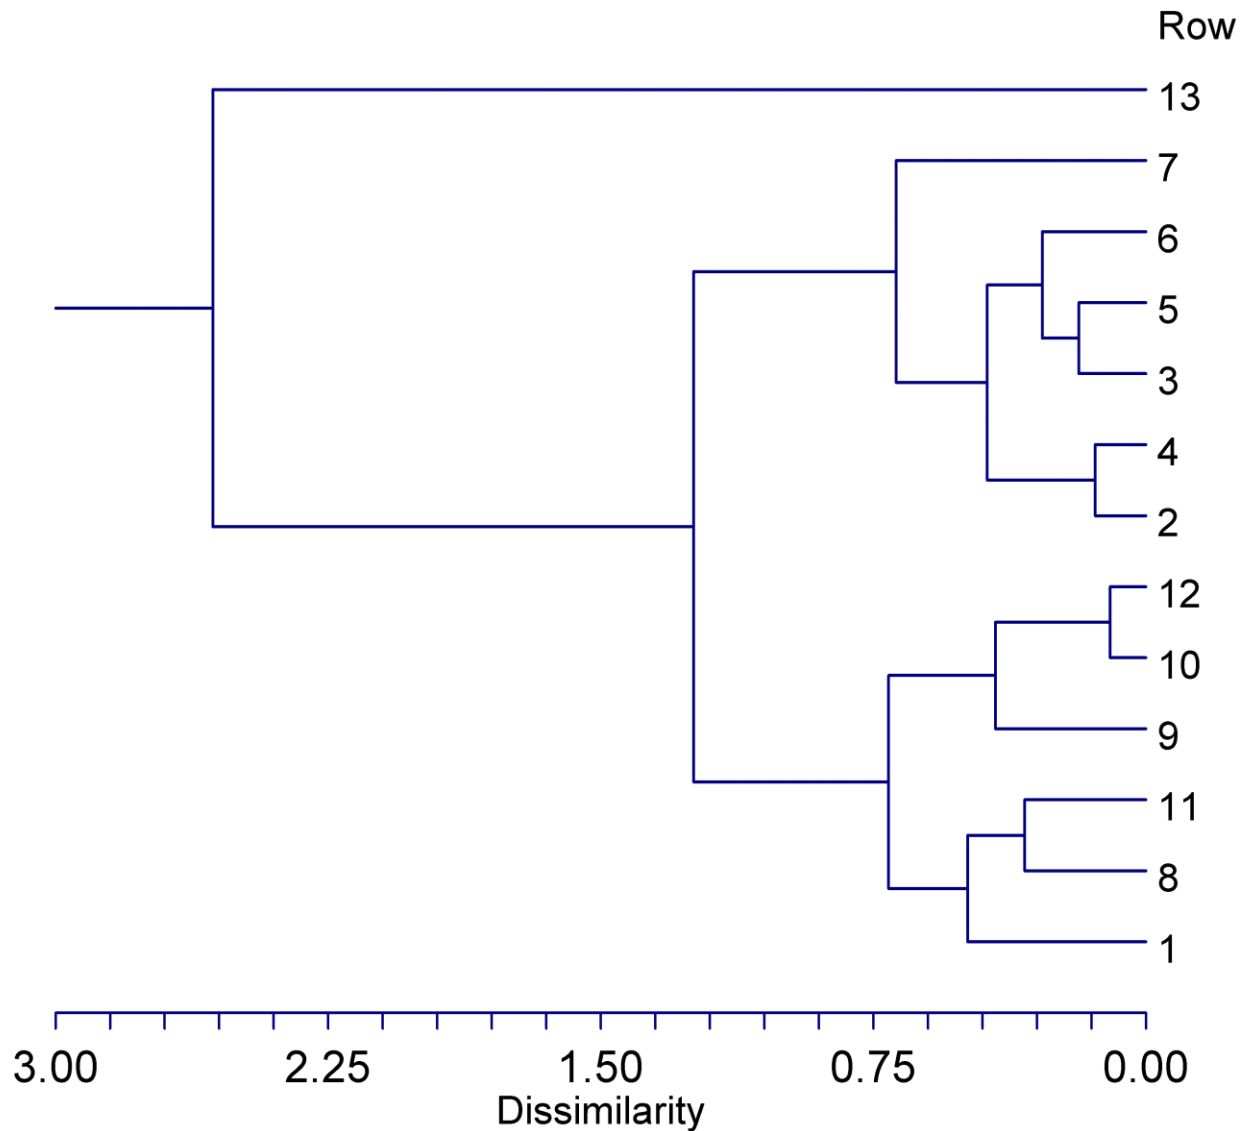

**Figure S2. Dendrogram classification of the 13 original R6/2 mice by the R6/2-ROC-supervised HCA.** Rows #1-7 are the 8-wk old R6/2 mice, whereas rows #8-13 are the 12-wk old R6/2 mice. The R6/2-ROC-supervised HCA failed to identify correctly the R6/2 mice. Looking in the area where there are only two clusters (Dissimilarity range of  $\sim 1.4$ - $2.3$ ), one can see that subject #13 was classified all by itself into the upper cluster, whereas all of the remaining subjects were classified into the lower cluster. This classification makes little sense. The top two most significant IVs (TTau & GPC+PC) (AUC>95%) according to the R6/2 ROC curve analysis were used in this setting.
